# Supplementary material for: Application of a needle trap device packed with a MIP@MOF nano-composite for efficient sampling and determination of airborne diazinon pesticide
Source: Royal Society of Chemistry journal article supplement (doi:10.1039/d2ra01614a), 2022-01-01
Supplement: d2ra01614a1.pdf [file d2ra01614a1.pdf]

# **Application of a Needle Trap Device packed with MIP@ MOF Nano-Composite for Efficient Sampling and Determination of Airborne Diazinon Pesticide**

Razzagh Rahimpour<sup>1</sup>, Ali Firoozichahak \*<sup>2</sup>, Saber Alizadeh<sup>3</sup>, Danial soleymani-ghoozhdi<sup>4</sup>,  
Faeze Mehregan<sup>5</sup>

*<sup>1</sup>Department of Occupational Health Engineering, Research Center for Health Sciences, School of Health, Larestan University of Medical Sciences, Larestan, Iran*

*<sup>2</sup> Department of Occupational Health, Faculty of Health, Social Determinants of Health Research Center, Gonabad University of Medical Science, Gonabad, Iran*

*<sup>3</sup>Department of Chemistry, Bu-Ali-Sina University, Hamedan, Iran.*

*<sup>4</sup> Student Research Committee, Faculty of Public Health, Kerman University of Medical Sciences, Kerman, Iran*

*<sup>5</sup> Medical student, school of medicine, Shahrekord University of Medical Sciences, Shahrekord, Iran.*

*\*Corresponding author. Ali firoozichahak, Faculty Member, Department of Occupational Health, Faculty of Health, Gonabad University of Medical Sciences, Gonabad, Iran.*

**Email:** [a.firoozi@edu.umsha.ac.ir](mailto:a.firoozi@edu.umsha.ac.ir)

**Table S1** Domain of selected parameters and optimum conditions.

| Parameters         | Sampling parameters       |                       | Desorption parameters      |                      |
|--------------------|---------------------------|-----------------------|----------------------------|----------------------|
|                    | Sampling Temperature (°C) | Sampling Humidity (%) | Desorption Temperature(°C) | Desorption Time(min) |
| parameter Ranges   | 20-60                     | 25-70                 | 200-290                    | 1-6                  |
| Optimum conditions | 20                        | 25                    | 262                        | 4.5                  |

**Table S2** Analysis of variance (ANOVA) table for the optimization of desorption parameters of Diazinon sampled with NTD: MOF-MIP

| Source         | Sum of Squares | Df <sup>a</sup> | Mean Square | F-Value | p-value Prob > F |                 |
|----------------|----------------|-----------------|-------------|---------|------------------|-----------------|
| Model          | 5.681E+006     | 5               | 1.136E+006  | 12.24   | 0.0024           | significant     |
| A-Temperature  | 1.055E+006     | 1               | 1.055E+006  | 11.37   | 0.0119           |                 |
| B-Time         | 1.053E+006     | 1               | 1.053E+006  | 11.35   | 0.0119           |                 |
| AB             | 11772.25       | 1               | 11772.25    | 0.13    | 0.7322           |                 |
| A <sup>2</sup> | 9.921E+005     | 1               | 9.921E+005  | 10.69   | 0.0137           |                 |
| B <sup>2</sup> | 1.215E+006     | 1               | 1.215E+006  | 13.09   | 0.0085           |                 |
| Residual       | 6.497E+005     | 7               | 92812.42    |         |                  |                 |
| Lack of Fit    | 2.987E+005     | 3               | 99566.72    | 1.13    | 0.4356           | not significant |
| Pure Error     | 3.510E+005     | 4               | 87746.70    |         |                  |                 |
| Cor Total      | 6.331E+006     | 12              |             |         |                  |                 |
| R-Squared      | 0.8974         |                 |             |         |                  |                 |
| Adj R-Squared  | 0.8241         |                 |             |         |                  |                 |

<sup>a</sup> df: Degree of freedom

**Table S3** Analysis of variance (ANOVA) table for the optimization of sampling parameters of Diazinon sampled with NTD: MOF-MIP

| Source         | Sum of Squares | Df <sup>a</sup> | Mean Square | F-Value | p-value<br>Prob > F |                 |
|----------------|----------------|-----------------|-------------|---------|---------------------|-----------------|
| Model          | 6.161E+006     | 5               | 1.232E+006  | 55.75   | < 0.0001            | significant     |
| A-Temperature  | 2.685E+006     | 1               | 2.685E+006  | 121.48  | < 0.0001            |                 |
| B-Humidity     | 2.021E+006     | 1               | 2.021E+006  | 91.42   | < 0.0001            |                 |
| AB             | 7.841E+005     | 1               | 7.841E+005  | 35.47   | 0.0006              |                 |
| A <sup>2</sup> | 4.641E+005     | 1               | 4.641E+005  | 21.00   | 0.0025              |                 |
| B <sup>2</sup> | 25949.82       | 1               | 25949.82    | 1.17    | 0.3145              |                 |
| Residual       | 1.547E+005     | 7               | 22104.87    |         |                     |                 |
| Lack of Fit    | 52456.92       | 3               | 17485.64    | 0.68    | 0.6069              | not significant |
| Pure Error     | 1.023E+005     | 4               | 25569.30    |         |                     |                 |
| Cor Total      | 6.316E+006     | 12              |             |         |                     |                 |
| R-Squared      | 0.9755         |                 |             |         |                     |                 |
| Adj R-Squared  | 0.9580         |                 |             |         |                     |                 |

<sup>a</sup> df: Degree of freedom

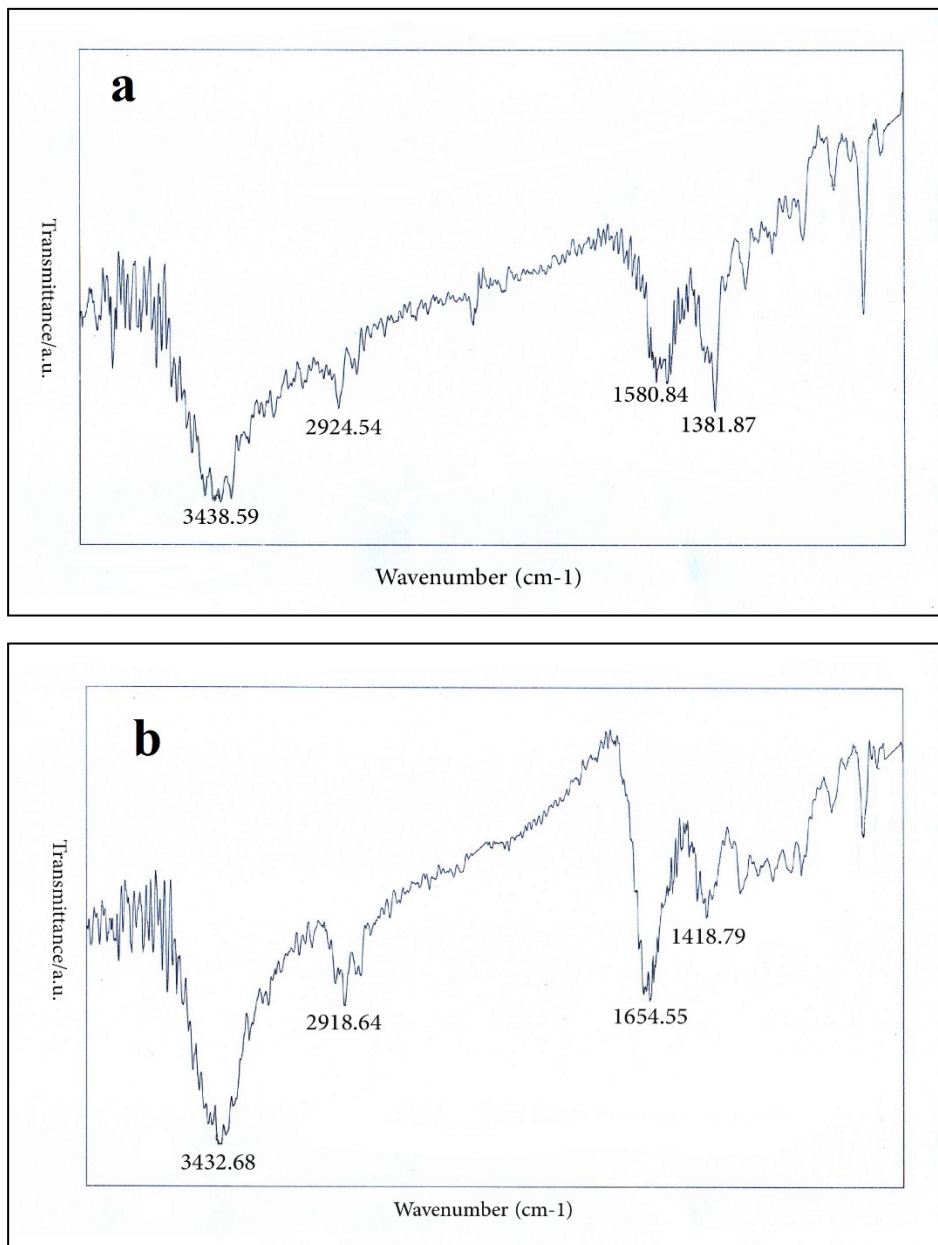

Fig. S1: FT-IR spectra of MOF and (a) and MIP@MOF (b)

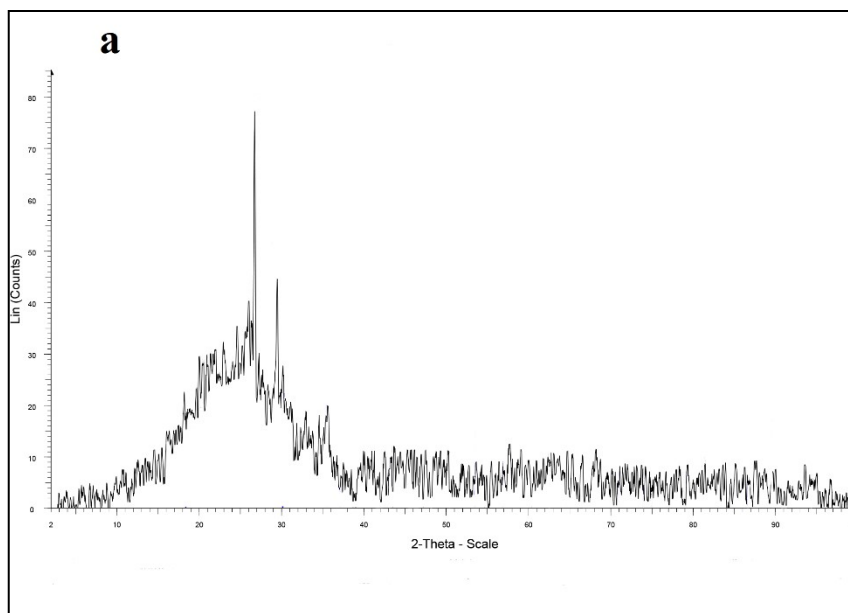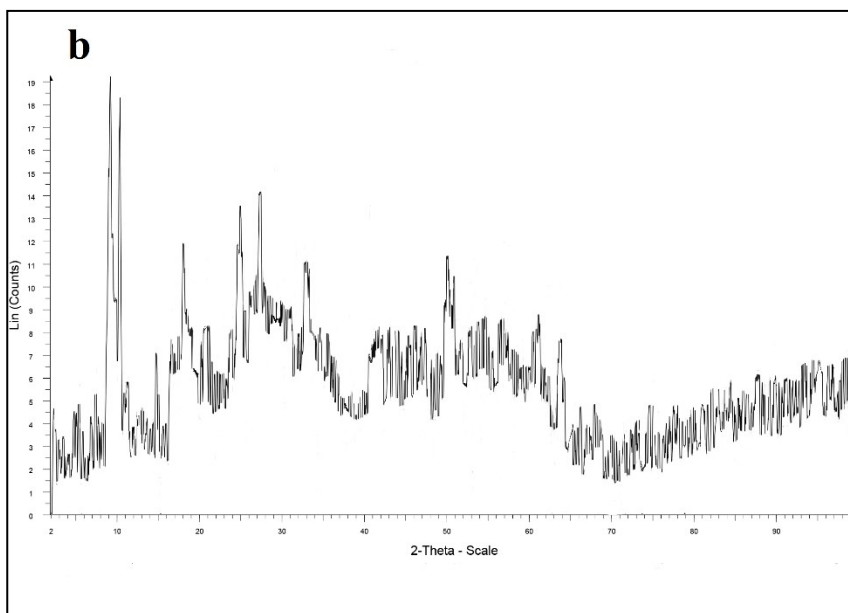

Fig. S2: The XRD patterns of MIP (a) and MIP@MIL-101(Fe) (b)

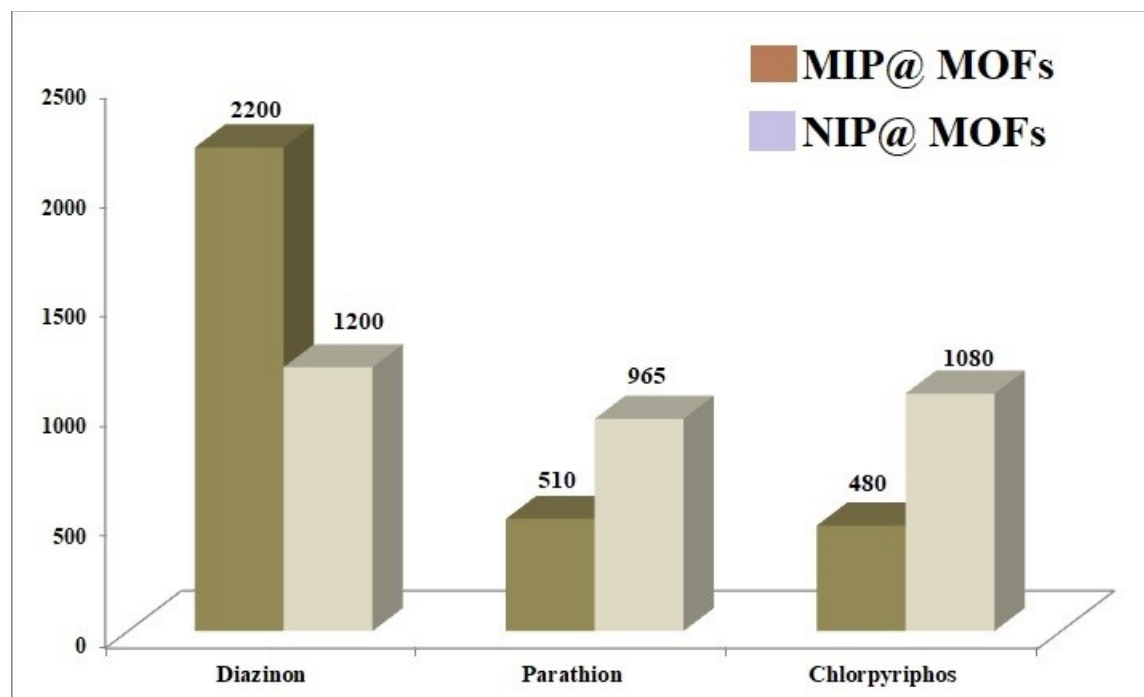

Fig. S3: Selectivity of MIP@MOF and NIP@MOF techniques for the sampling, extraction and determination of diazinon from the air sample

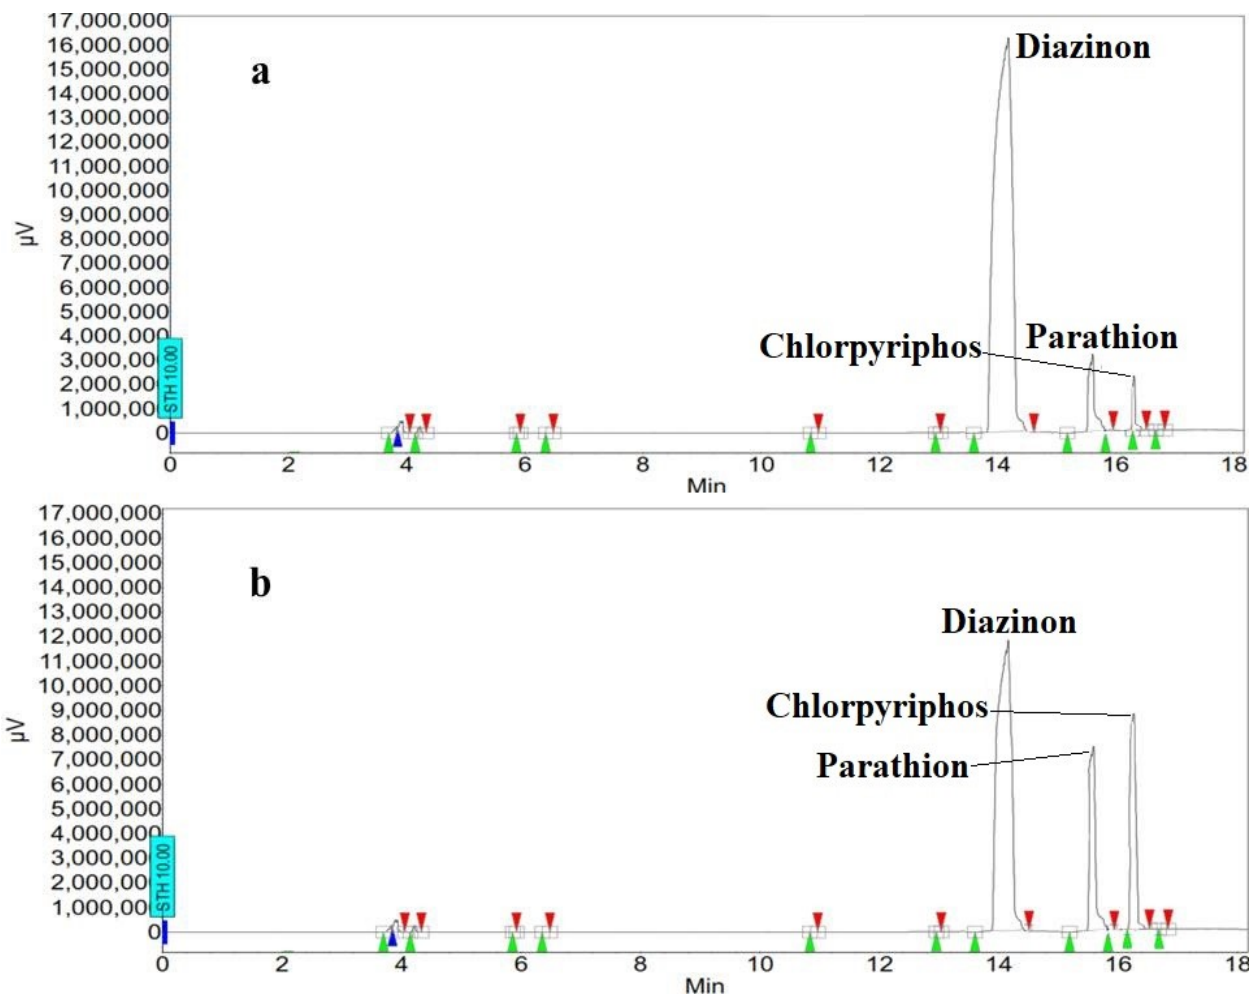

Fig. S4: The obtained chromatograms from the extraction of diazinon in the air by (a) MIP@MOF:NTD and (b) NIP@MOF:NTD systems
